# Supplementary material
Source: MDPI journal article supplement (https://www.mdpi.com/2410-3888/8/1/13)
Supplement: s1 [file s1]

## Supplementary Materials

**Table S1.** LefSe analysis results showing differentially abundant (log transformed LDA score > 2.5,  $p < 0.05$ ) metabolic pathways (inferred by PICRUST2) in intestinal content ( $n = 4$ ) and intestinal wall ( $n = 4$ ).  $p$ -values were not adjusted.

| Pathway                                                                                      | Type               | LDA_score_log10 | p-value |
|----------------------------------------------------------------------------------------------|--------------------|-----------------|---------|
| adenine_and_adenosine_salvage_III                                                            | Intestinal_content | −3.251          | 0.043   |
| purine_ribonucleosides_degradation                                                           | Intestinal_content | −3.223          | 0.021   |
| superpathway_of_purine_deoxyribonucleosides_degradation                                      | Intestinal_content | −3.193          | 0.021   |
| acetylene_degradation                                                                        | Intestinal_content | −3.135          | 0.021   |
| superpathway_of_N-acetylneuraminate_degradation                                              | Intestinal_content | −3.085          | 0.021   |
| superpathway_of_pyrimidine_deoxyribonucleosides_degradation                                  | Intestinal_content | −3.056          | 0.021   |
| superpathway_of_N-acetylglucosamine,_N-acetylmannosamine_and_N-acetylneuraminate_degradation | Intestinal_content | −3.040          | 0.021   |
| superpathway_of_adenosine_nucleotides_de_novo_biosynthesis_I                                 | Intestinal_content | −3.006          | 0.021   |
| pyrimidine_deoxyribonucleosides_salvage                                                      | Intestinal_content | −2.938          | 0.043   |
| chitin_derivatives_degradation                                                               | Intestinal_content | −2.920          | 0.021   |
| starch_degradation_V                                                                         | Intestinal_content | −2.908          | 0.043   |
| thiazole_biosynthesis_II_(Bacillus)                                                          | Intestinal_content | −2.827          | 0.043   |
| 6-hydroxymethyl-dihydropterin_diphosphate_biosynthesis_III_(Chlamydia)                       | Intestinal_content | −2.818          | 0.021   |
| adenosine_ribonucleotides_de_novo_biosynthesis                                               | Intestinal_content | −2.720          | 0.021   |
| superpathway_of_polyamine_biosynthesis_III                                                   | Intestinal_content | −2.650          | 0.043   |
| superpathway_of_L-tyrosine_biosynthesis                                                      | Intestinal_content | −2.578          | 0.021   |
| D-fructuronate_degradation                                                                   | Intestinal_content | −2.557          | 0.021   |
| flavin_biosynthesis_I_(bacteria_and_plants)                                                  | Intestinal_content | −2.553          | 0.021   |
| methylphosphonate_degradation_I                                                              | Intestinal_wall    | 2.527           | 0.021   |
| TCA_cycle_VII_(acetate-producers)                                                            | Intestinal_wall    | 2.542           | 0.043   |
| L-histidine_degradation_II                                                                   | Intestinal_wall    | 2.552           | 0.021   |
| superpathway_of_polyamine_biosynthesis_II                                                    | Intestinal_wall    | 2.608           | 0.021   |
| allantoin_degradation_to_glyoxylate_III                                                      | Intestinal_wall    | 2.615           | 0.021   |
| superpathway_of_arginine_and_polyamine_biosynthesis                                          | Intestinal_wall    | 2.620           | 0.021   |
| superpathway_of_menaquinol-9_biosynthesis                                                    | Intestinal_wall    | 2.627           | 0.021   |
| superpathway_of_menaquinol-10_biosynthesis                                                   | Intestinal_wall    | 2.628           | 0.021   |
| enterobactin_biosynthesis                                                                    | Intestinal_wall    | 2.636           | 0.021   |
| superpathway_of_hexuronide_and_hexuronate_degradation                                        | Intestinal_wall    | 2.639           | 0.021   |
| superpathway_of_menaquinol-6_biosynthesis_I                                                  | Intestinal_wall    | 2.640           | 0.021   |
| toluene_degradation_II_(aerobic)_(via_4-methylcatechol)                                      | Intestinal_wall    | 2.675           | 0.021   |
| toluene_degradation_I_(aerobic)_(via_o-cresol)                                               | Intestinal_wall    | 2.684           | 0.021   |
| superpathway_of_chorismate_metabolism                                                        | Intestinal_wall    | 2.760           | 0.021   |
| glucose_degradation_(oxidative)                                                              | Intestinal_wall    | 2.761           | 0.021   |
| superpathway_of_L-tryptophan_biosynthesis                                                    | Intestinal_wall    | 2.779           | 0.021   |
| D-galacturonate_degradation_I                                                                | Intestinal_wall    | 2.786           | 0.021   |
| peptidoglycan_biosynthesis_IV_(Enterococcus_faecium)                                         | Intestinal_wall    | 2.794           | 0.043   |
| 2-methylcitrate_cycle_I                                                                      | Intestinal_wall    | 2.794           | 0.021   |
| NAD_salvage_pathway_II                                                                       | Intestinal_wall    | 2.813           | 0.021   |
| 2-methylcitrate_cycle_II                                                                     | Intestinal_wall    | 2.815           | 0.021   |
| superpathway_of_heme_biosynthesis_from_glycine                                               | Intestinal_wall    | 2.843           | 0.021   |

|                                                         |                 |       |       |
|---------------------------------------------------------|-----------------|-------|-------|
| L-methionine_biosynthesis_III                           | Intestinal_wall | 2.867 | 0.021 |
| protocatechuate_degradation_II_(ortho-cleavage_pathway) | Intestinal_wall | 2.879 | 0.021 |
| L-tyrosine_degradation_I                                | Intestinal_wall | 2.881 | 0.021 |
| ectoine_biosynthesis                                    | Intestinal_wall | 2.882 | 0.021 |
| cob(II)yrinate_a,c-                                     | Intestinal_wall | 2.889 | 0.021 |
| diamide_biosynthesis_II_(late_cobalt_incorporation)     | Intestinal_wall | 2.889 | 0.043 |
| guanosine_nucleotides_degradation_III                   | Intestinal_wall | 2.929 | 0.021 |
| superpathway_of_glucose_and_xylose_degradation          | Intestinal_wall | 2.958 | 0.021 |
| octane_oxidation                                        | Intestinal_wall | 2.958 | 0.021 |
| L-leucine_degradation_I                                 | Intestinal_wall | 3.012 | 0.021 |
| 4-aminobutanoate_degradation_V                          | Intestinal_wall | 3.033 | 0.021 |
| purine_nucleotides_degradation_II_(aerobic)             | Intestinal_wall | 3.107 | 0.021 |
| L-arginine_biosynthesis_III_(via_N-acetyl-L-citrulline) | Intestinal_wall | 3.125 | 0.021 |
| fatty_acid_salvage                                      | Intestinal_wall | 3.169 | 0.021 |
| TCA_cycle_VIII_(helicobacter)                           | Intestinal_wall | 3.204 | 0.021 |
| adenosine_nucleotides_degradation_II                    | Intestinal_wall | 3.311 | 0.021 |

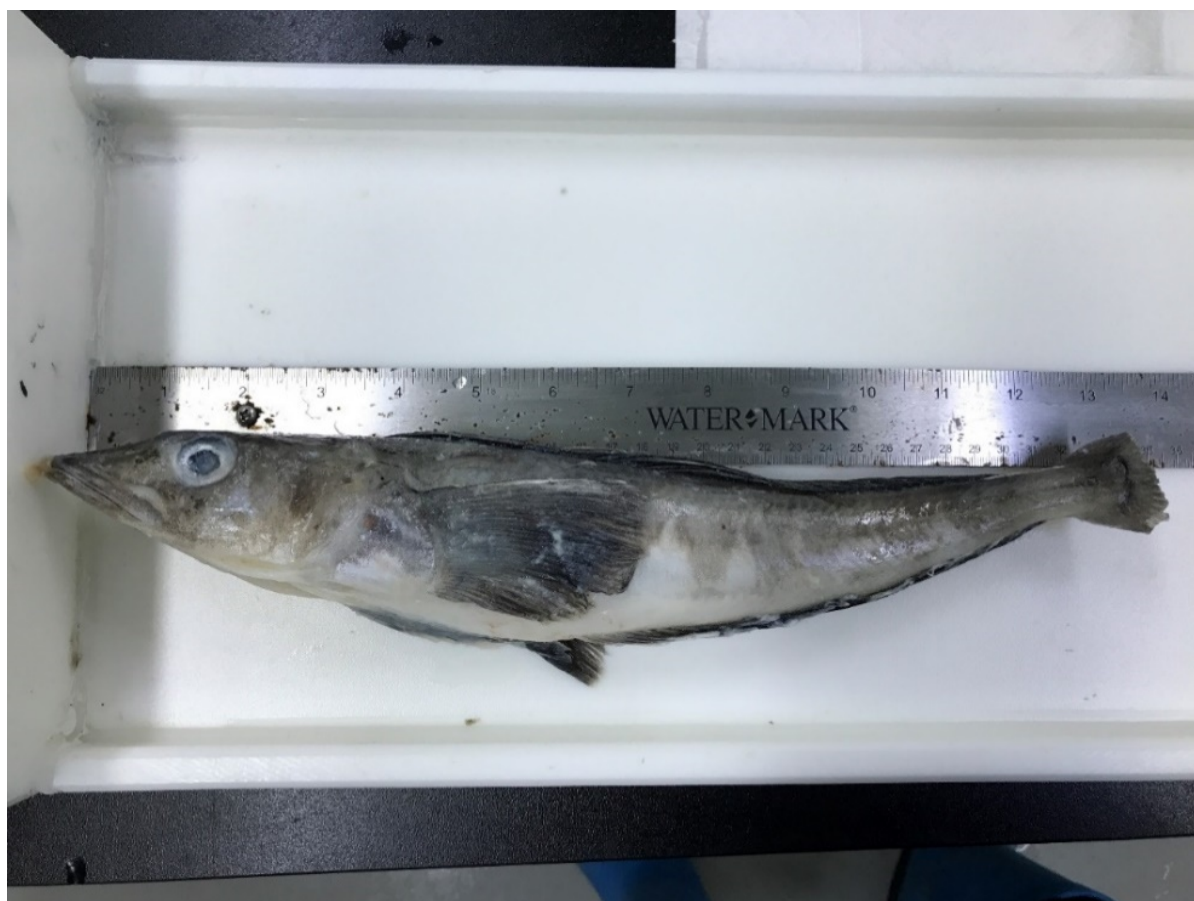

**Figure S1.** A photo of defrosted mackerel icefish, *Champsocephalus gunnari*.

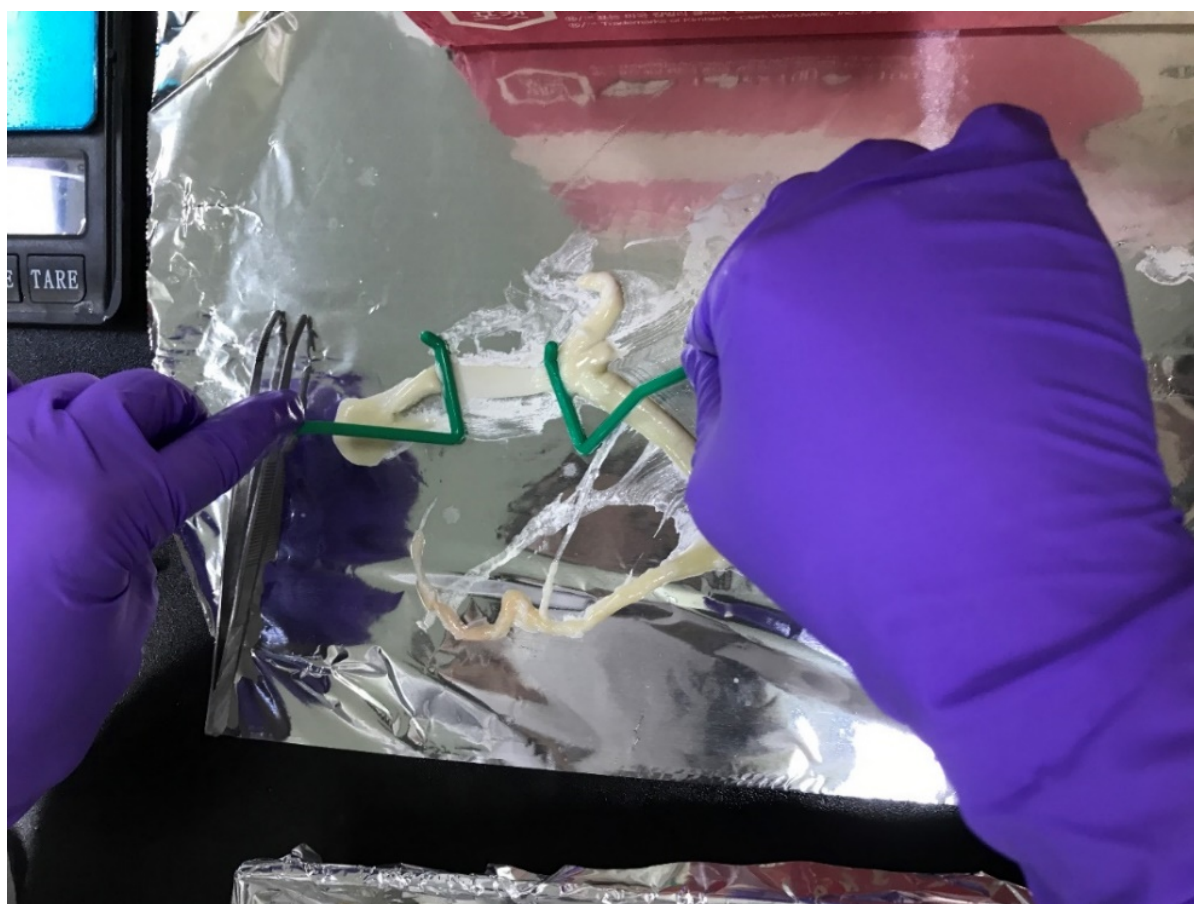

**Figure S2.** The use of spreaders for squeezing out the intestinal contents from the wall.

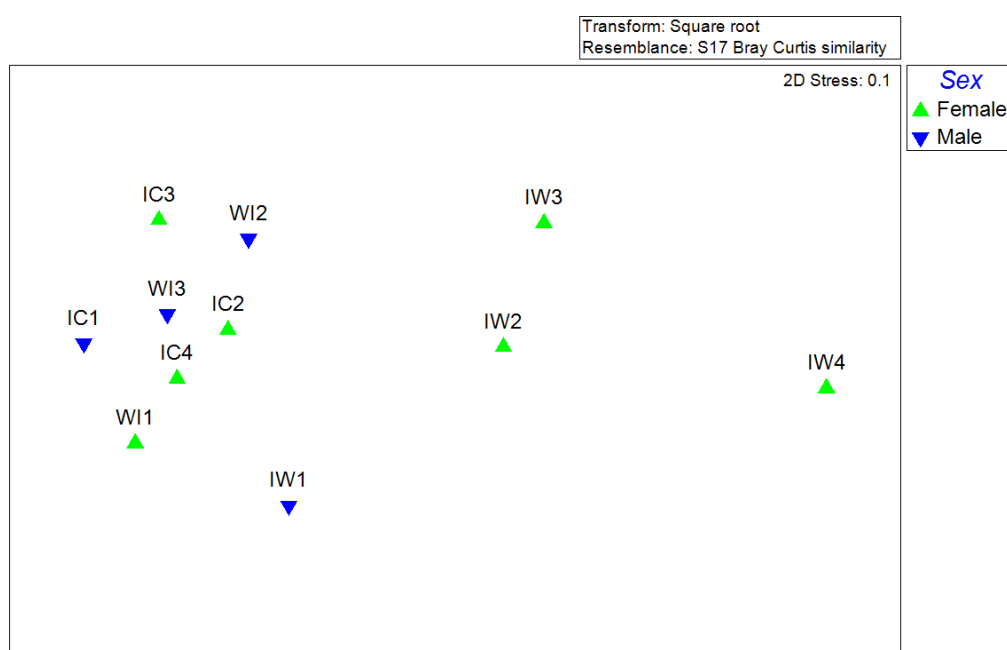

**Figure S3.** Non-metric multidimensional plot based on the Bray-Curtis dissimilarity between samples. Samples are grouped by sex. WI: whole intestine; IW: intestinal wall; IC: intestinal content.

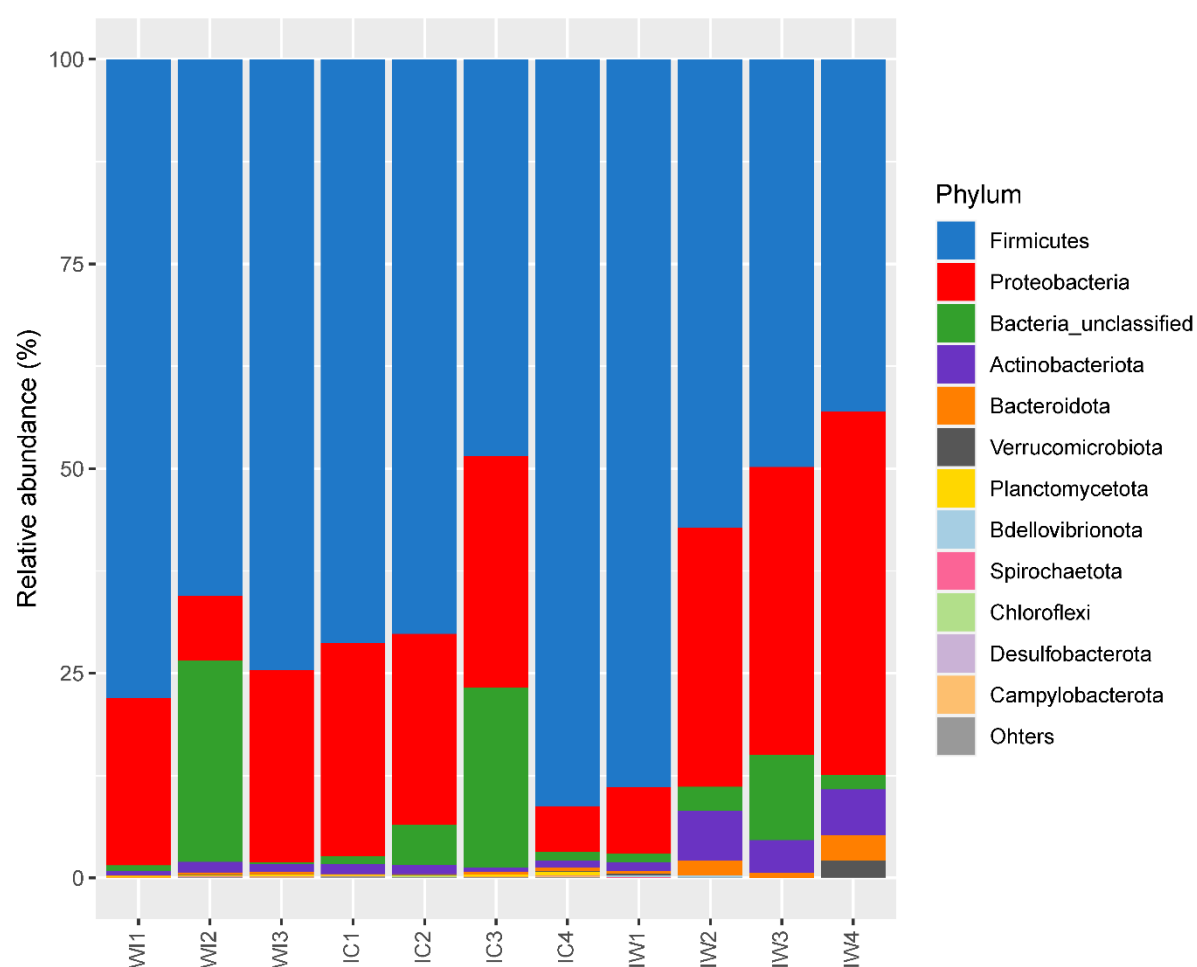

**Figure S4.** Phylum composition of the *C. gunnari* gut microbiome. WI: whole intestine; IW: intestinal wall; IC: intestinal content.
